# Supplementary material for: Marine heatwaves deeply alter marine food web structure and function
Source: Copernicus journal article supplement (doi:10.5194/egusphere-2024-3696), 2024-12-19
Supplement: Supplementary file 1 [file egusphere-2024-3696-supplement.pdf]

1 Supplementary Materials for

2

3 **Marine heatwaves deeply alter marine food web structure and**

4 **function**

## S1: MHW loss rate algorithm computation

- MHW characterisation and detection

To characterise MHW in each ocean spatial cell, we analysed daily SST observations from the NOAA's AVHRR data (Reynolds et al., 2007; <https://www.ncei.noaa.gov/access/metadata/landing-page/bin/iso?id=gov.noaa.ncdc:C00680>). We defined MHW as a discrete prolonged anomalously warm water event when the daily SSTs exceed an extreme temperature threshold value for at least five consecutive days (A. J. Hobday et al., 2016). The extreme temperature threshold value was calculated for each 1° latitude x 1° longitude spatial cell as the 90th percentile of daily SST from the 30-year historical time series from January 1982 to December 2011. We did not calculate threshold values by season; thus, MHW events were identified by a single threshold across the year. As a result, we detected MHWs mostly occurring during the year's warmest months (see figure S1a for schematic explanation). This approach to identifying the MHW threshold represents biological extreme temperature in the local (spatial cell) context. It is appropriate to assess the direct mortality associated with MHWs (Oliver et al., 2021). We determined a reference average sea surface temperature (SST average) for each spatial cell by analysing data from the 1<sup>st</sup> of January 1982 to the 31<sup>st</sup> of December 2011. Utilising this reference average SST, we classified each spatial cell into 'thermal classes,' with each class representing a 1°C increment of the reference SST average ranging from -1°C to 29°C (refer to Figure S1b). We used the R package `heatwaveR` described at <https://robwschlegel.github.io/heatwaveR/> to compute MHWs characteristics in each spatial cell from January 1982 to December 2021. Thus, we finally obtained MHW characteristics for each 1° per 1° of longitude and latitude ocean cell up to December 2021. The considered MHW characteristics are the threshold value defining MHWs, MHW's duration (in days), category and intensity (mean SST anomaly) and declaration of MHW days over the SST time series.

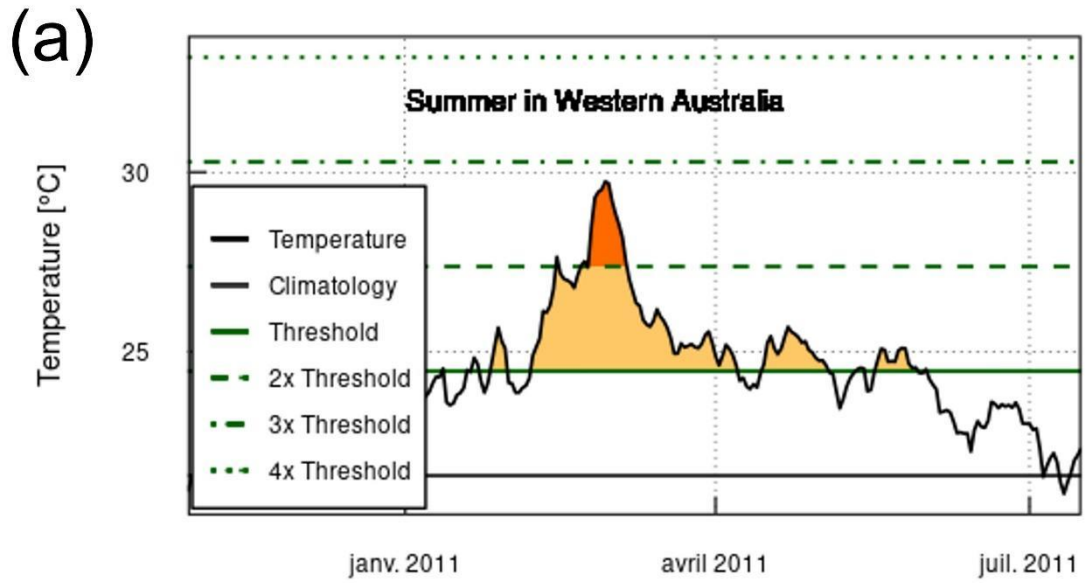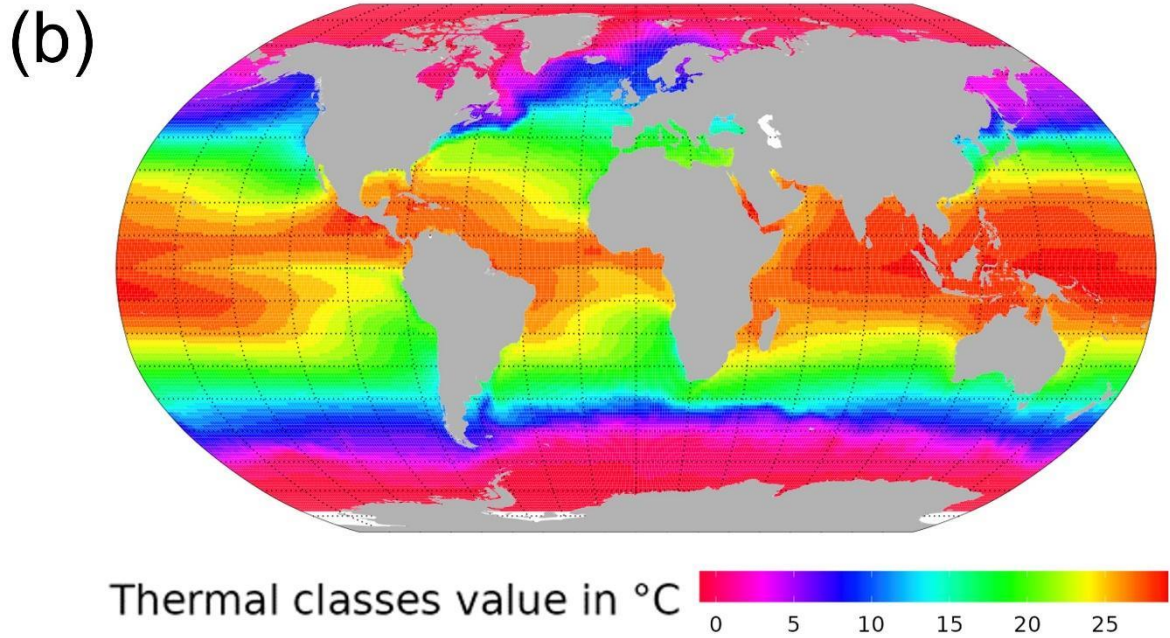

28

29

**Figure S1: Marine heatwave detection method and reference average SST of each ocean cell.**

30 (a) Schematic explanation of MHWs detection for a spatial cell. The solid horizontal green and black

31 lines represented the extreme threshold value and the reference temperature, respectively. (b) A map

32 of thermal classes of 10°C intervals from -1 to 29°C categorised based on the reference temperature

33 at each spatial cell over the period from 1st January 1982 to 31st December 2011.

34

35                   •    Estimation of species distribution and associated thermal niche

36                   We developed an algorithm depending on the MHWs' characteristics to express the loss rate  
37 of trophic transfers associated with MHW. First, we identified a list of marine species with their  
38 occurrence records (3242 bivalves, 500 cephalopods species, 3116 crabs species, and 12782 fish  
39 species) gathered from the publicly accessible databases: OBIS ([www.iobis.org](http://www.iobis.org)), the  
40 Intergovernmental Oceanographic Commission ([ioc-unesco.org](http://ioc-unesco.org)), GBIF ([www.gbif.org](http://www.gbif.org)), Fishbase  
41 ([www.fishbase.org](http://www.fishbase.org)), and the International Union for the Conservation of Nature  
42 (<http://www.iucnredlist.org/technical-documents/spatial-data>). We then cleaned the data by  
43 removing duplicate entries, terrestrial occurrences, and occurrences outside the known species  
44 habitat from the aggregated species occurrence dataset (Froese & Pauly, 2018). Additionally, we  
45 excluded zooplankton from the algorithm development due to limited evidence of direct mortality  
46 induced by Marine Heatwaves (MHWs), with observed responses mainly manifesting as range shifts  
47 and alterations in community structure (Arimitsu et al., 2021; Suryan et al., 2021; Winans et al., 2023).  
48 Marine mammals and seabirds were also omitted from algorithm development, as their mortality  
49 linked to MHWs primarily stems from secondary effects such as diminished quality and quantity of  
50 food supply (Cavole et al., 2016; Piatt et al., 2020) rather than direct heat stress impact. Subsequently,  
51 the data were rasterised into a grid covering the global oceans (1° longitude by 1° latitude), denoting  
52 the historical presence of each species. Species with occurrence records in fewer than 30 cells were  
53 excluded from further analysis (Hernandez et al., 2006).

54                   In a second step, we utilised an ensemble species distribution modelling approach (Asch et al.,  
55 2018; Reygondeau, 2019) at a 1° grid scale. Four environmental niche models (ENMs) were applied:  
56 Bioclim, Boosted Regression Trees models (Thuiller et al., 2009), Maxent (Phillips et al., 2006), and the  
57 Non-Parametric Probabilistic Ecological Niche model (Beaugrand et al., 2011), using global climatology  
58 satellite data (AVHRR). Model accuracy was assessed using the area under the curve (AUC) analysis of  
59 the receiver operating characteristic (ROC), discarding models with AUC below 0.5 (Sing et al., 2005).  
60 The evaluation employed the pROC package in R (Robin et al., 2011). We then calculated the average

61 Habitat Suitability Index (HSI) weighted by the AUC values of each ENM for each spatial cell and species.  
62 An HSI threshold for each species was estimated using their prevalence. Spatial cells with HSI below  
63 the threshold were deemed non-viable habitats.

64 Species' predicted thermal niches were quantified from spatial distributions using averaged  
65 satellite sea surface temperature (SST) data (AVHRR) from 1982 to 2011. The average SST from 1982  
66 to 2011 was recorded for each spatial cell above the HSI threshold. We then characterised the  
67 predicted thermal niche (histogram of all the average values of SST), and more specifically, the upper-  
68 temperature threshold, for each species from the 95th percentile of the SST records where they were  
69 predicted to occur.

70 • Additional loss rate associated with MHW

71 For each spatial cell belonging to each thermal class, we calculated the percentage of species  
72 in each trophic class exposed to thermal stress induced by MHWs intensity above their estimated  
73 temperature threshold (95th percentile of their thermal niche). Matching MHW intensity in each  
74 spatial cell from 1981 to 2021 with species' temperature thresholds, we determined the percentage  
75 of species exposed to temperatures exceeding their thresholds. Thermal stress of a species was  
76 assumed dependent on MHW category (1 to 4, based on SST anomaly) and species' trophic level (<2.5,  
77 2.5-3.0, 3.0-3.5, 3.5-4.0, 4.0-4.5, 4.5-5.0, >5.0), estimated from FishBase and SeaLifeBase.

78 To obtain a continuous representation of the percentage of species undergoing a thermal stress  
79 as the intensity of MHW increases, we decided to transform the discrete MHW categorisation (A.  
80 Hobday et al., 2018) to a continuous MHW intensity index as follows:

81 
$$MHW_{cat,i} = \frac{MHW \text{ mean anomaly},i}{cat1 \text{ associated anomaly},i} \text{ (Eq. S1)}$$

82 MHW mean anomaly was calculated as the difference between the MHW mean SST anomaly  
83 and the reference temperature of each thermal class (i), and “cat1 associated anomaly” is the mean  
84 threshold value used to identify category 1 MHWs in each spatial cell.

85 We fit the estimated percentage of species undergoing thermal stress with the MHW intensity  
 86 index and species' trophic class to a nonlinear function. A Gompertz function was selected after  
 87 preliminary tests because it is better fitted to data than logistic or other mathematical functions with  
 88 similar shapes. The Gompertz function is expressed as:

89 
$$\text{Percentage of species undergoing a thermal stress} = \exp^{-\exp^{b_{tl_i}(MHW_{cat,i} - lt50_{tl_i})}} \quad (\text{Eq. S2});$$

90 We estimated the parameters  $b_{tl_i}$ ,  $lt50_{tl_i}$ , and  $MHW_{cat,i}$  for each thermal class  $i$ . The  
 91 parameters  $b_{tl_i}$  and  $lt50_{tl_i}$  correspond to the slope of the function and the index of marine  
 92 heatwave intensity ( $MHW_{cat,i}$ ) at which 50% of the species are undergoing thermal stress,  
 93 respectively.

94 For each thermal class  $i$ , parameters  $b_{tl_i}$  and  $lt50_{tl_i}$  were expressed as (figure S2):

95 
$$b_{tl_i} = -1.4511 - e^{0.4223 \cdot (i - 22.4926)} \quad (\text{Eq. S3}) \text{ and}$$

96 
$$lt50_{tl_i} = 3.29 - 0.485 \cdot i + 0.0306 \cdot i^2 - 0.000608 \cdot i^3 \text{ when trophic level } < 2.5 \text{ and}$$

97 
$$lt50_{tl_i} = 3.55 - 0.271 \cdot i + 0.014 \cdot i^2 - 0.000304 \cdot i^3 \text{ when trophic level } \geq 2.5. \quad (\text{Eq. S4})$$

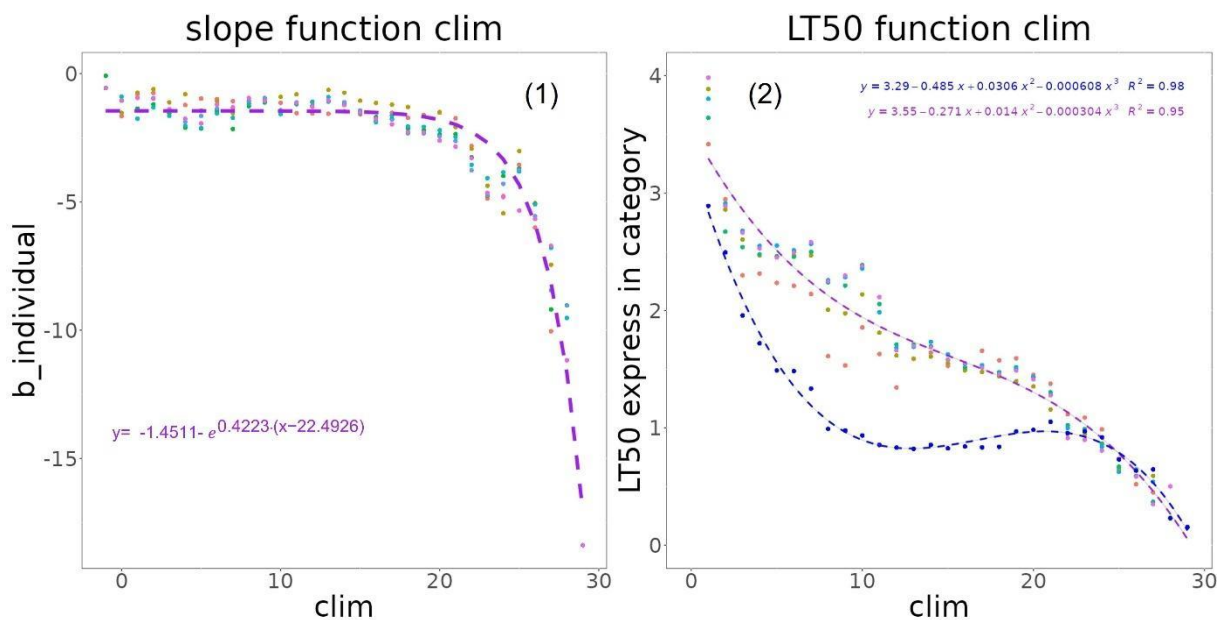

98  
 99 **Figure S2: coefficient of each reference temperature individual thermal stress algorithm**  
 100 **model.** With (1) corresponding to the Gompertz slope at the inflexion point coefficient ( $b$ ) and (2) the  
 101 MHW category that causes 50% of species to undergo thermal stress ( $lt50$ ) with blue and other colours  
 102 corresponding to the trophic levels below 2.5 and above 2.5, respectively.

103

104 Finally, to move from the thermally stressed stage to the loss rate ( $\eta_i$ ), we assumed that species  
105 were continuously challenged by MHW increased intensity (Figure S3 for schematic differences)  
106 expressed as.

107 
$$\eta_i = \exp^{-\exp^{b_i \cdot \alpha \cdot \left( MHW_{cat,i} - \frac{lt50_i}{\alpha} \right)}} \cdot \beta \quad (\text{Eq. S5})$$

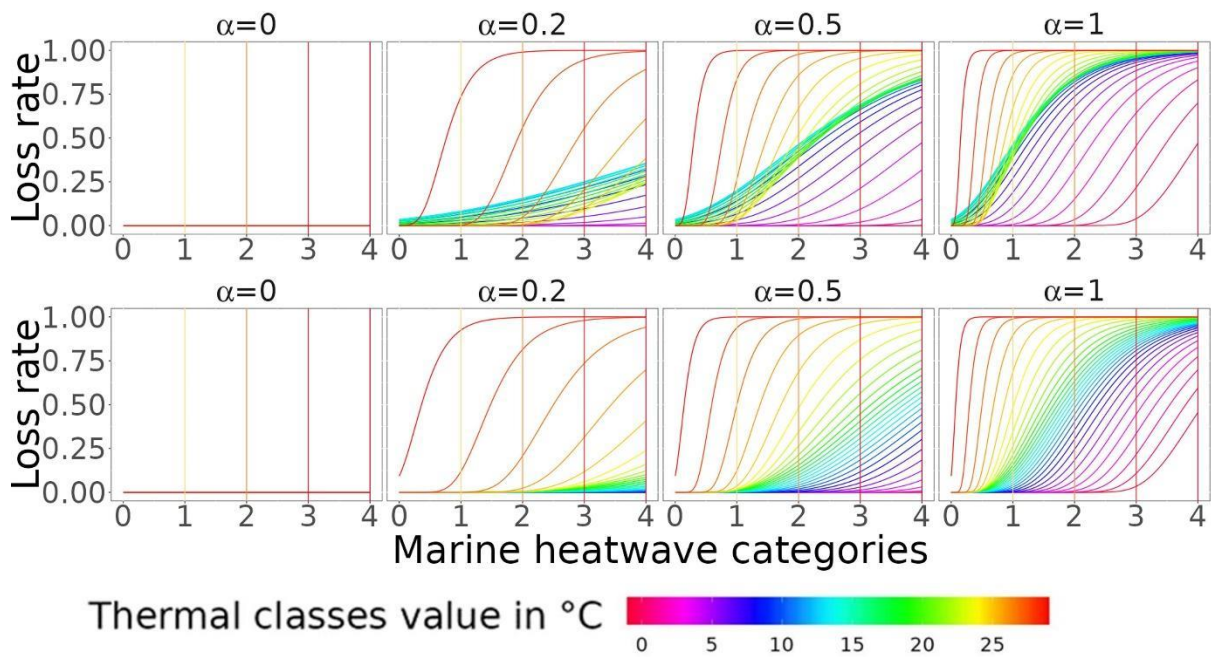

108

109 **Figure S3: loss rate associated with MHWs occurrences.** With the ecological hypothesis that  
110 MHW increases in intensity/category continuously challenge the aggregated response across species.  
111 On the plots, b is equal to 1. The top bottom and bottom rows correspond to the loss rate of trophic  
112 level <2.5 and trophic level >=2.5, respectively.

113

114 We explored the sensitivity of the results to species' acclimation capacity to MHW conditions  
115 by assuming that acclimation reduces the mortality rate due to species' exposure to thermal stress.

116 We tested four acclimation capacity settings represented by the values of the coefficient  $\alpha$ . These  
117 settings are full acclimation ( $\alpha = 0$ ; no mortality due to thermal stress), partial acclimation ( $\alpha = 0.2, 0.5$ ;

118 20%, and 50% of the species die because of thermal stress, respectively) and no acclimation ( $\alpha = 1$ ; all

119 species die when they are under thermal stress). We also related the loss rate to the MHW duration  
120 over the fortnight by assuming that the duration increases the mortality rate. The duration of MHW is  
121 represented by  $\beta$  and ranges from  $\beta=0$ ; no MHW to  $\beta=1$ ; MHW lasting 15 days of the fortnight (see  
122 section 2.3.2 for  $\beta$  computation).

123

124

125

126

127

128

129

130

131

132

133

134

135

136

137

138

139

140

141

142

143

144



**S2: Study area.**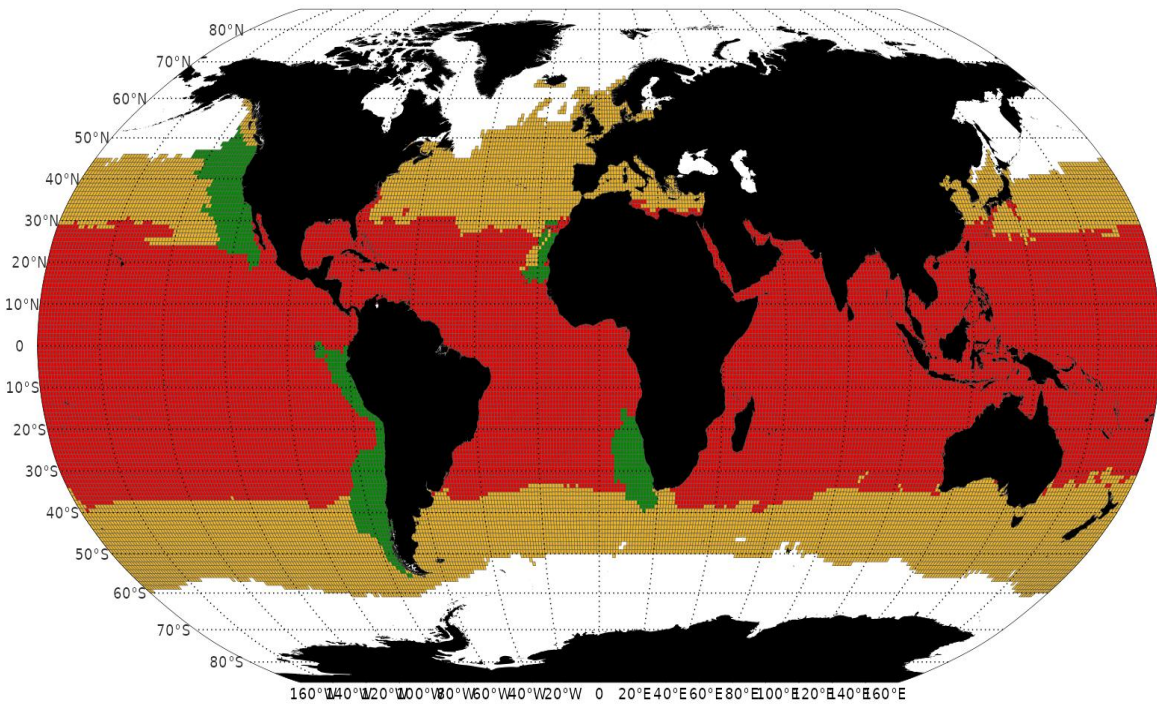

146 **Figure S4: Map of where EcoTroph-Dyn was applied and the associated biome types.** The colours  
147 refer to the biome types: temperate (orange), tropical (red) and upwelling (green).  
148

149  
150  
151  
152  
153  
154  
155  
156  
157  
158  
159  
160  
161  
162  
163  
164  
165  
166  
167  
168  
169  
170  
171

### S3: Time series decomposition

To create scenarios without MHWs SST time series, we decomposed the daily SST time series ( $Y_t$ ) of each ocean spatial cell using a Census X-11 procedure (Vantrepotte and Mélin, 2011, Shiskin et al 1967, Pezulli et al 2005). With this method, the time series can be decomposed as:

$$Y_t = T_t + S_t + H_t$$

With  $Y_t$  the daily SST of day  $t$ ,  $T_t$  the underlying long-term direction component,  $S_t$  the seasonal component (repetitive pattern over time), and  $H_t$  an irregular component, which is the unexplained variation of the time series that is not attributed to trend or seasonality.

The  $T_t$  underlying long-term direction is obtained from the annual-centered running average of the initial series  $Y_t$ . The  $S_t$  the seasonal component is then computed by applying a seasonal running mean to the trend-adjusted series ( $Y_t - T_t$ ) to derive seasonal coefficients avoiding any confusion with the inter-annual (trend) signal. After revised estimates of these two components (Vantrepotte and Mélin, 2011, Pezulli et al 2005), the residual component is computed as

$$H_t = Y_t - S_t - T_t.$$

We applied the following procedure to create a daily SST time series for the scenarios without MHWs:

When the daily  $Y_t$  value was declared as an MHW day and  $Y_t$  was above the threshold ( $T_t + S_t$ ), we re-assigned the daily SST value ( $Y_t$ ) to the value of the threshold ( $T_t + S_t$ ). For all the other situations (MHW day with  $Y_t$  below the threshold ( $T_t + S_t$ ) or that the day was not an MHW day), we let the daily SST value  $Y_t$  assigned to its original value (figure S5).

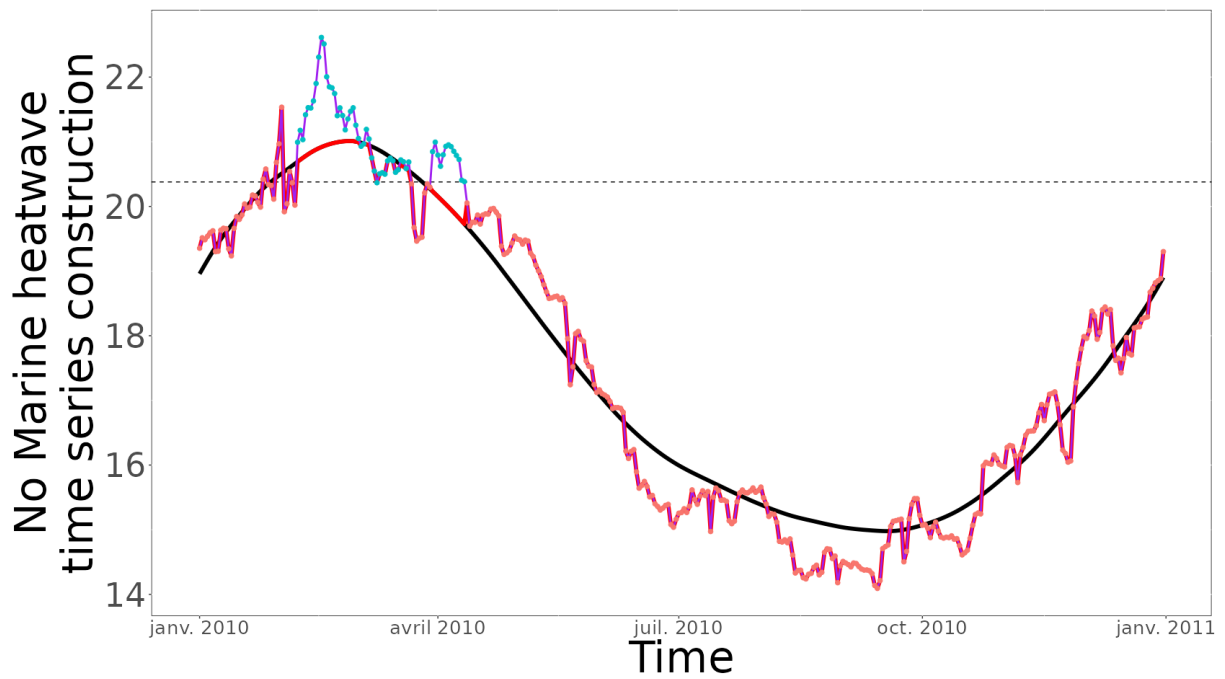

172

173 **Figure S5: Illustration of the removal of MHWs from the time series.** With blue and red points  
 174 correspond to MHW days and non-MHW days, respectively. The original time series of SST,  
 175 represented by  $Y_t$ , is shown as a thin purple line. The time series of SST with MHWs removed is  
 176 depicted by a thick red line. The combination of the long-term linear trend and the seasonal  
 177 component denoted as  $T_t + S_t$ , is illustrated with a thick black line. Additionally, the dotted grey line  
 178 represents the fixed threshold value used for detecting MHWs in the specific ocean cell chosen for the  
 179 illustration.

180

181

### S4: 'Burn in' period applied to EcoTroph-Dyn model.

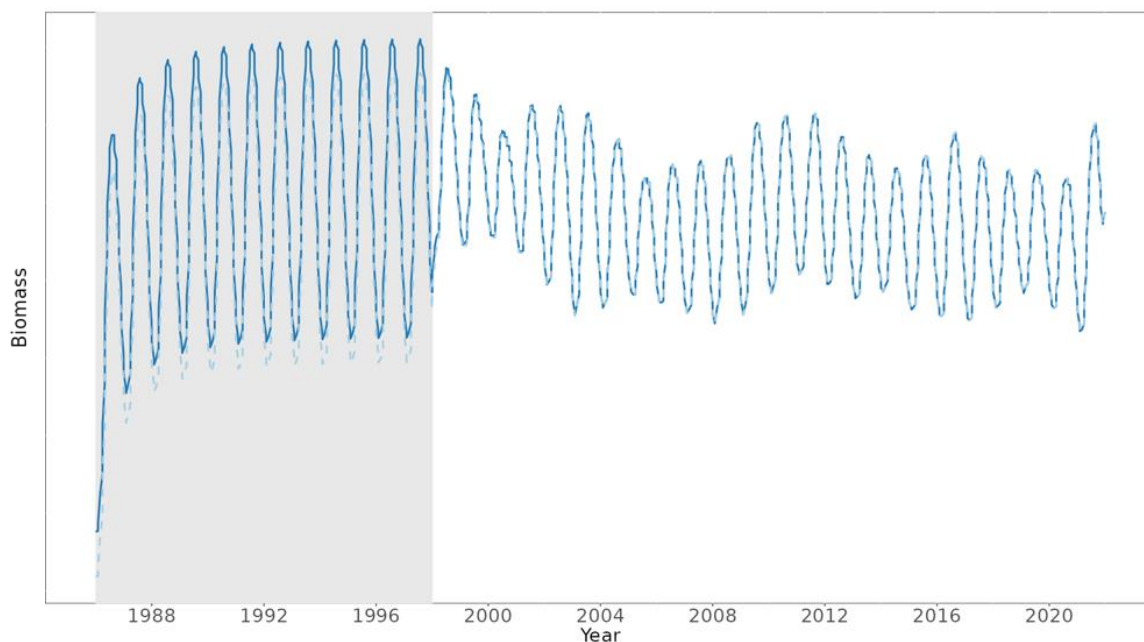

182

183 **Figure S6: Illustration of the removal of MHWs from the time series.** With initialisation period  
184 1998\_2021 and 1998\_2006 corresponding to the darker blue solid line and lighter blue dashed line,  
185 respectively. The vertical grey shaded area indicates the 12 years of initialisation period. Afterward the  
186 hindcast analysis begins. Tests demonstrated no statistically significant differences, indicating that  
187 EcoTroph-Dyn simulations were not dependent of the initialization period onward (t.test  
188  $p\_value=0.6118$ ).

189

190 **S5: Yearly simulation masked the effects of the short-term**

191 **impacts of MHWs on the long-term changes in consumer biomass**

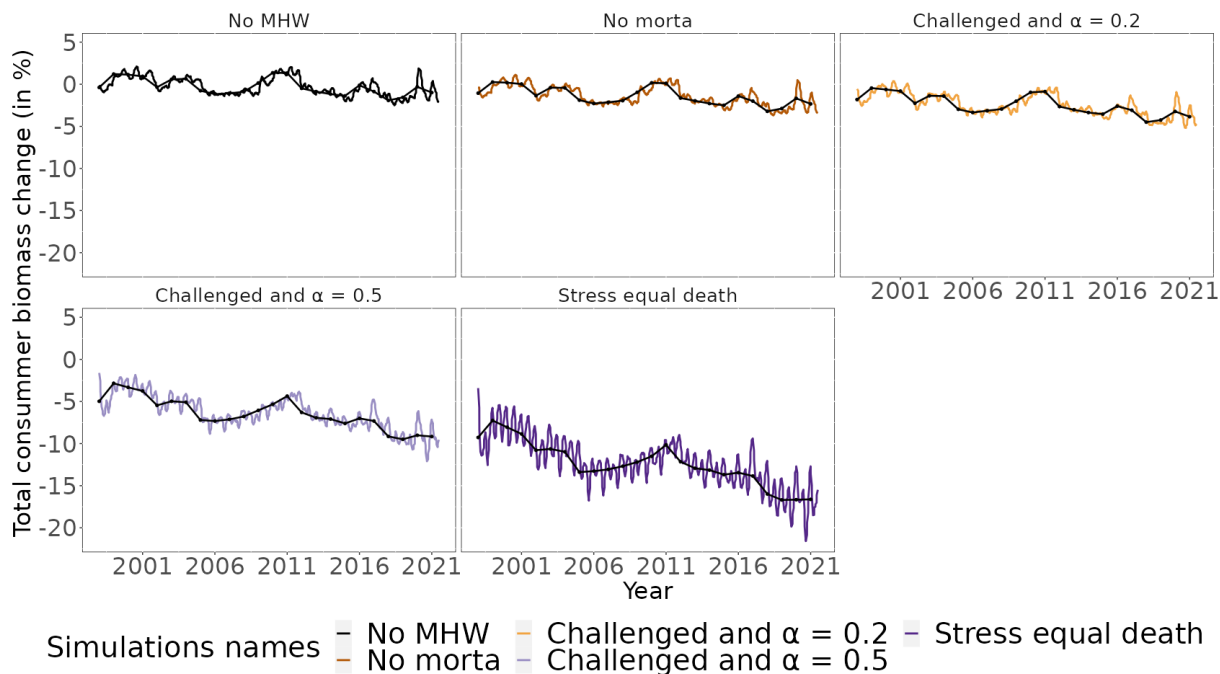

193 **Figure S7: Yearly vs fortnight biomass evolution.** With coloured lines and black lines corresponding to

194 the fortnight and yearly biomass evolution respectively.

195  
196  
197  
198  
199  
200  
201  
202  
203  
204  
205  
206  
207  
208  
209  
210  
211  
212  
213

## S6: MHWs effects on low trophic level (TLE [2;3]).

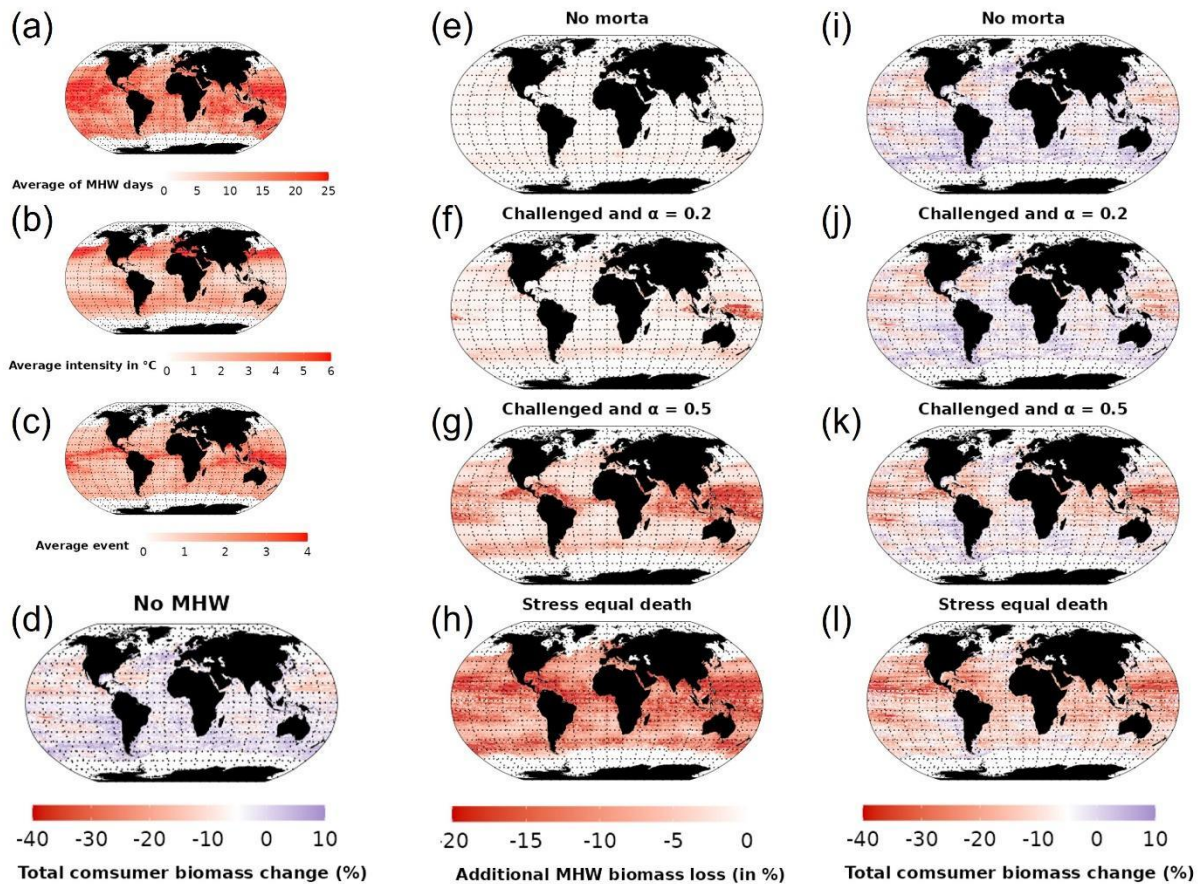

215

216 **Figure S8: Additional MHW's associated biomass loss for low TL between 2015 to 2021 compared to**  
 217 **1998\_2009.** With (a, b, and c) maps of average MHWs days, average MHWs intensity, and average  
 218 number of MHWs events between 2015 and 2021, respectively; (d) average low TL (TL between 2 and  
 219 3) biomass change between 2015 and 2021 compared to 1998 to 2009 without accounting for MHWs;  
 220 ((e), (f), (g), and (h)) additional low TL biomass loss associated to MHWs without additional mortality,  
 221 challenged  $\alpha=0.2$ , challenged  $\alpha=0.5$ , and Stress equal death, respectively; ((i), (j), (k), and (l))  
 222 corresponding of the low TL biomass change between 2015 and 2021 of these simulation compare to  
 223 1998 to 2009 of No MHWs reference simulation.

224

225

## S7: MHWs effects on medium trophic level (TLE [3;4]).

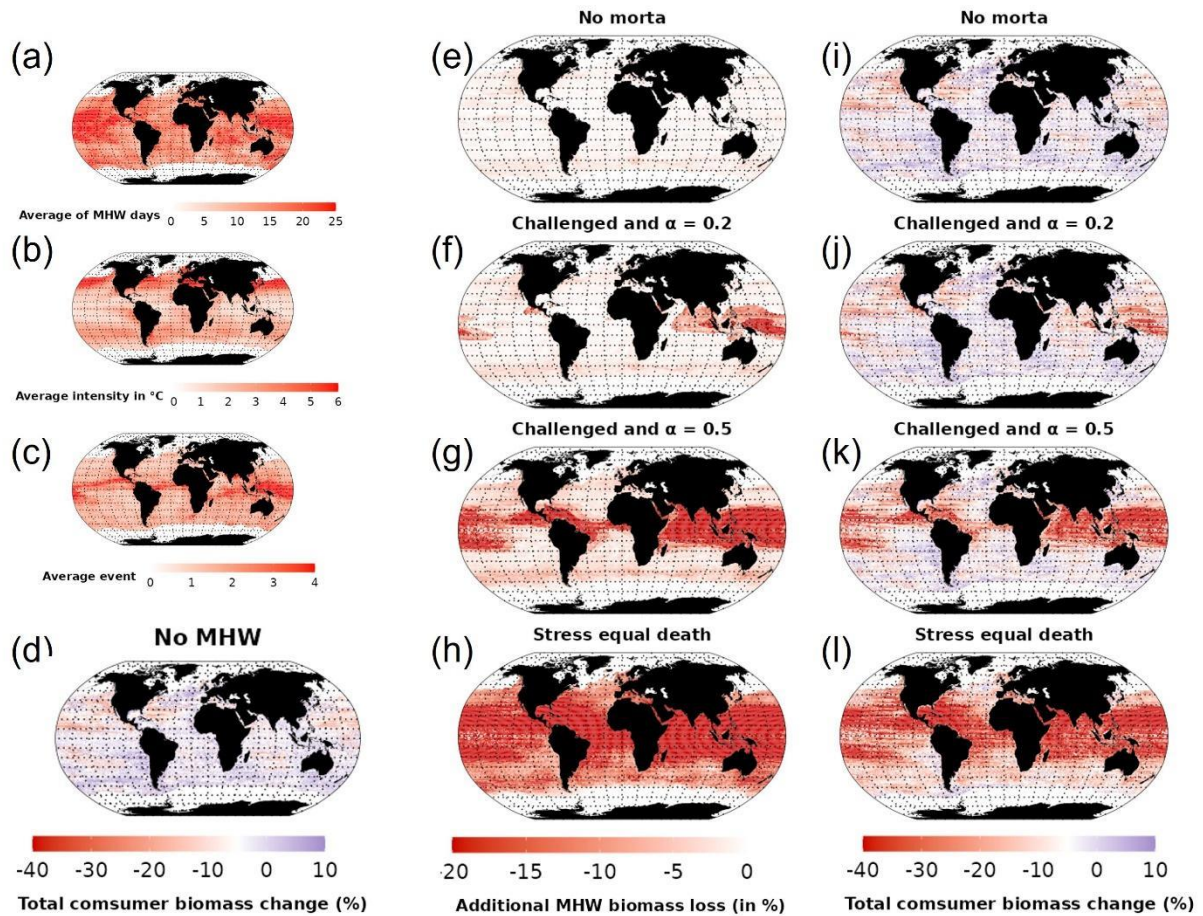

227

228 **Figure S9: Additional MHW's associated biomass loss for medium TL between 2015 to 2021**

229 **compared to 1998\_2009.** With (a, b, and c) maps of average MHWs days, average MHWs intensity,

230 and average number of MHWs events between 2015 and 2021, respectively; (d) average high TL (TL

231 above 4) biomass change between 2015 and 2021 compared to 1998 to 2009 without accounting for

232 MHWs; ((e), (f), (g), and (h)) additional high TL biomass loss associated to MHWs without additional

233 mortality, challenged  $\alpha=0.2$ , challenged  $\alpha=0.5$ , and Stress equal death, respectively; ((i), (j), (k), and (l))

234 corresponding of the high TL biomass change between 2015 and 2021 of these simulation compare to

235 1998 to 2009 of No MHWs reference simulation.

236

237

## S8: MHWs effects on high trophic level (TL= 4-5.5).

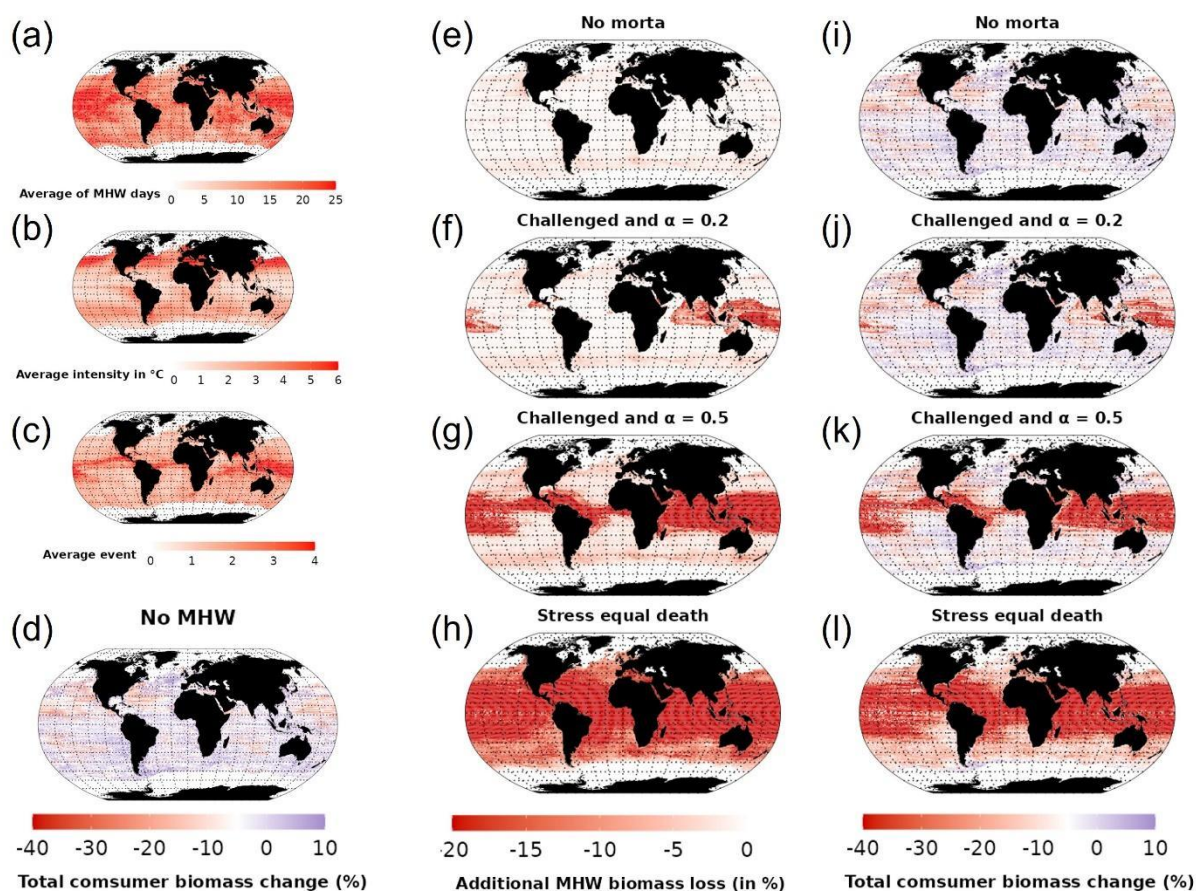

239

240 **Figure S10: Additional MHW's associated biomass loss for high TL between 2015 to 2021 compared**  
 241 **to 1998\_2009.** With (a, b, and c) maps of average MHWs days, average MHWs intensity, and average  
 242 number of MHWs events between 2015 and 2021, respectively; (d) average medium TL (TL between 3  
 243 and 4) biomass change between 2015 and 2021 compared to 1998 to 2009 without accounting for  
 244 MHWs; ((e), (f), (g), and (h)) additional medium TL biomass loss associated to MHWs without additional  
 245 mortality, challenged  $\alpha=0.2$ , challenged  $\alpha=0.5$ , and Stress equal death, respectively; ((i), (j), (k), and (l))  
 246 corresponding of the medium TL biomass change between 2015 and 2021 of these simulation compare  
 247 to 1998 to 2009 of No MHWs reference simulation.

248



249

## S9: Food-web response to ‘the Blob’ MHW.

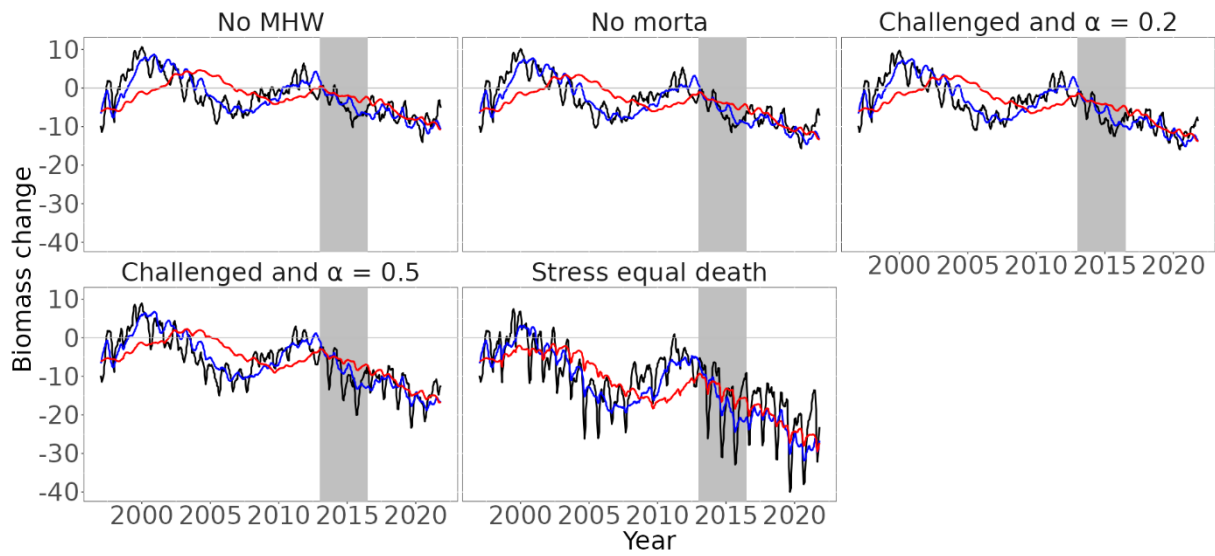

250

251 **Figure S11: Blob-associated biomass loss over food web compartment compared to “without MHW”**  
252 **simulation 1998\_2009 reference period.** With low TL (trophic level  $\in [2; 3[$ ), medium TL (trophic level  
253  $\in [3; 4[$ ), and high TL (trophic level  $\geq 4$ ) responses to MHWs corresponding to black, blue, and red  
254 lines, respectively.

255

256

257

258

259

260

261

262

263

264

265

## S10: Biomass flow response to ‘the Blob’ MHW.

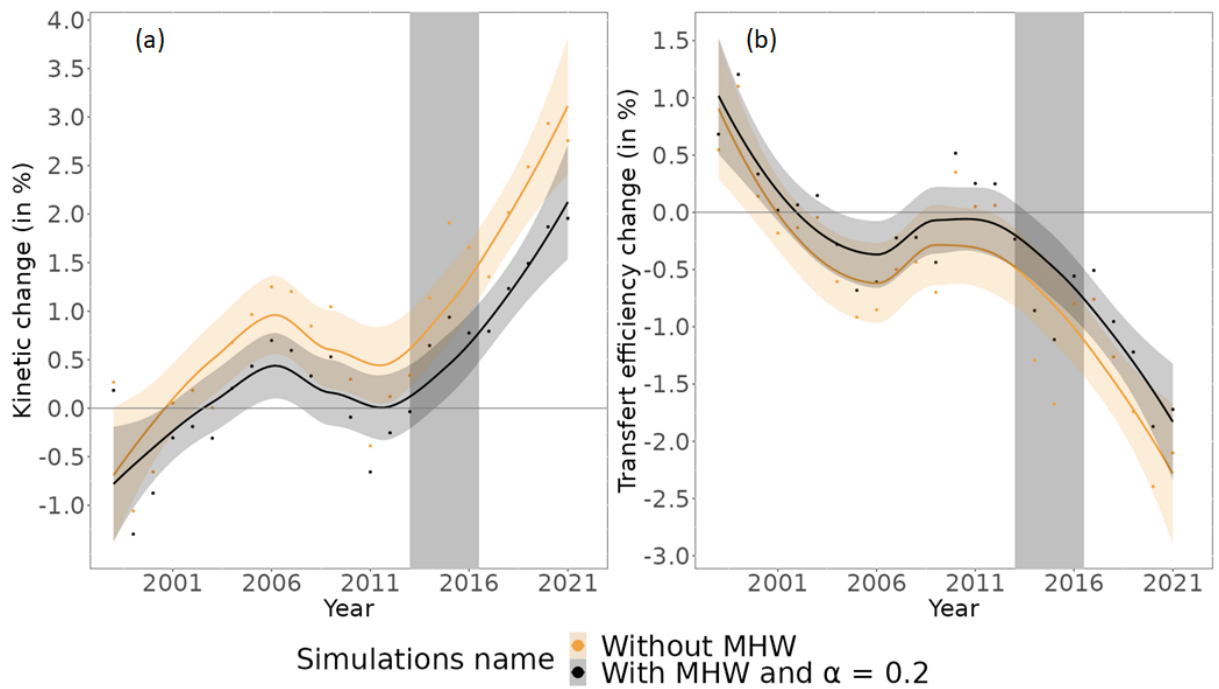

267

268 **Figure S12: Hindcast changes in biomass flow processes (i.e. trophodynamic parameters) in the**269 **Northeast Pacific between 1998 and 2021 relative to 1998-2009 “Without MHW” reference. (a)**270 **Changes in flow kinetic. (b) transfer efficiency changes. The shaded areas around the curves represent**271 **the standard error. Without MHW and with MHWs scenarios correspond to the black and light orange**272 **colour**
